# Supplementary material
Source: PubMed Central journal article supplement (PMC7686887)
Supplement: advancesADV2020003001-suppl1.pdf [file advancesADV2020003001-suppl1.pdf]

**Supplemental Table 1: Characteristics of the patients at time of decision (TD)**

|                                   | <b>N</b> | <b>Median {IQR}</b> |
|-----------------------------------|----------|---------------------|
|                                   | 116      |                     |
| Age                               | 116      | 60.74 [49.17;67.61] |
| ≥65                               | 42       | 36.2%               |
| Male sex                          | 75       | 64.7%               |
| B symptoms                        | 20       | 17.2%               |
| Lymphoma                          |          |                     |
| DLBCL                             | 93       | 80.2%               |
| PMBL                              | 6        | 5.2%                |
| Transformed FL                    | 17       | 14.7%               |
| BCL2 expression > 70%             | 20/37    | 54.0%               |
| MYC expression >40%               | 21/44    | 47.7%               |
| >80%                              | 11/44    | 25.0%               |
| Primary refractory                | 77/106   | 66.4%               |
| Number of prior lines             | 116      | 3 [2;4]             |
| Number prior lines ≥ 4            | 34       | 29.3%               |
| Prior autograft ; Prior allograft | 33 ; 3   | 28.4% ; 2.6%        |
| ECOG Performance Status           |          |                     |
| 0                                 | 52       | 44.8%               |
| 1                                 | 52       | 44.8%               |
| 2                                 | 12       | 10.3%               |
| Ann Arbor stage III/IV            | 89       | 76.7%               |
| ExtraNodal sites                  | 116      | 1 [0 ;2]            |
| 0                                 | 42       | 36.2%               |
| 1                                 | 41       | 35.3%               |
| ≥ 2                               | 33       | 28.4%               |
| LDH level                         | 101      | 462 [386 ; 609]     |
| Elevated LDH                      | 55/116   | 47.4%               |
| IPI                               |          |                     |
| Low                               | 35       | 30.2%               |
| Low-Intermediate                  | 36       | 31.0%               |
| High-Intermediate                 | 28       | 24.1%               |
| High                              | 17       | 14.6%               |

|                          |    |       |
|--------------------------|----|-------|
| Revised IPI<br>very good | 10 | 8.6%  |
| good                     | 61 | 52.6% |
| poor                     | 45 | 38.8% |

DLBCL: diffuse large B cell lymphoma – PMBL: primary B cell lymphoma –  
Transformed FL : transformed follicular lymphoma – IPI international prognostic index

Supplemental data Table 2. Supplemental data – Univariate analysis for progression or relapse, early progression or relapse, and death

Hazards ratios (HR) of events are reported with 95% confidence intervals (95%CI) and p-value from Wald test. Note that for continuous variables, to let the estimated HR more relevant, we modified the scale to estimate the hazard ratio of events for two patients differing by 100 units of LDH, and by 10 units of CRP or of albumin. Underlying log-linearity assumptions were checked using splines, and Grambsch and Therneau test.

GC Germinal center; PS : performance status; LDH lactico-deshydrogenase; IPI: international prognostic index; L: Low Low - int: Low intermediate; High-int: High – intermediate; H: high; ECOG PS: Performance status

|                                 |          | No patients | PROGRESSION or RELAPSE |               |         | EARLY PROGRESSION or RELAPSE < 1 month |             |         | SURVIVAL |               |         |
|---------------------------------|----------|-------------|------------------------|---------------|---------|----------------------------------------|-------------|---------|----------|---------------|---------|
|                                 |          |             | HR                     | 95%CI         | p-value | OR                                     | 95%CI       | p-value | HR       | 95%CI         | p-value |
| Age, years                      | ≥ 65     | 42          | 0.87                   | (0.50 ; 1.52) | 0.63    | 0.68                                   | (0.27-1.73) | 0.42    | 0.63     | (0.27 ; 1.47) | 0.28    |
| Sex                             | M        | 75          | 1.62                   | (0.91 ; 2.9)  | 0.10    | 2.27                                   | (0.83-6.18) | 0.11    | 3.16     | (1.2 ; 8.28)  | 0.020   |
| GC/ nGC                         | GC       | 39          | 0.78                   | (0.39 ; 1.54) | 0.47    | 1.10                                   | (0.34-3.55) | 0.87    | 1.09     | (0.36 ; 3.24) | 0.88    |
|                                 | nGC      | 33          | 1.48                   | (0.69 ; 3.17) | 0.31    | 0.64                                   | (0.19-2.11) | 0.46    | 1.42     | (0.46 ; 4.35) | 0.54    |
| Lymphoma subtype                | DLBCL    | 89          | 1.00                   |               |         | 1.00                                   |             |         | 1.00     |               |         |
|                                 | PMBL     | 8           | 0.78                   | (0.28 ; 2.17) | 0.63    | 0.96                                   | (0.18-5.08) | 0.96    | 0.78     | (0.18 ; 3.3)  | 0.73    |
|                                 | tFL      | 19          | 0.41                   | (0.16 ; 1.04) | 0.06    | 0.34                                   | (0.07-1.57) | 0.17    | 0.60     | (0.18 ; 2.01) | 0.41    |
| <b>At.time of decision (TD)</b> |          |             |                        |               |         |                                        |             |         |          |               |         |
| ECOG PS                         | >1       | 14          | 1.98                   | (1.00 ; 3.93) | 0.049   | 2.02                                   | (0.61-6.65) | 0.25    | 3.27     | (1.16 ; 9.22) | 0.03    |
| Ann Arbor stage                 | III / IV | 89          | 2.89                   | (1.31 ; 6.39) | 0.009   | 10.7)                                  | (1.38-83.3) | 0.023   | 9.43     | (1.28 ; 69.3) | 0.028   |
| Nb of ExtraN.sites              | ≥ 2      | 116         | 1.51                   | (1.23 ; 1.85) | <0.0001 | 1.94                                   | (1.32-2.83) | 0.0007  | 1.8      | (1.37 ; 2.35) | <0.0001 |
| LDH, /100                       |          | 101         | 1.21                   | (1.13; 1.3)   | <0.0001 | 1.42                                   | (1.16-1.73) | 0.0006  | 1.16     | (1.08 ; 1.24) | <0.0001 |

|                                                                       |              |          |              |                  |          |      |               |            |      |                |         |
|-----------------------------------------------------------------------|--------------|----------|--------------|------------------|----------|------|---------------|------------|------|----------------|---------|
| IPI                                                                   | Low IPI      | 36       | 0.22         | (0.1 ; 0.48)     | 0.00     | 0.08 | (0.015-0.47)  | 0.005      | 0.04 | (0.01 ; 0.19)  | 0.000   |
|                                                                       | Low-int IPI  | 35       | 0.35         | (0.17 ; 0.74)    | 0.01     | 0.30 | (0.08-1.09)   | 0.067      | 0.18 | (0.07 ; 0.48)  | 0.001   |
|                                                                       | High-int IPI | 28       | 0.55         | (0.26 ; 1.15)    | 0.11     | 1.07 | (0.32-3.64)   | 0.91       | 0.3  | (0.12 ; 0.75)  | 0.010   |
|                                                                       | High IPI     | 17       | 1.00         |                  |          | 1.00 |               |            | 1.00 |                |         |
| Revised.IPI                                                           | other        | 71       | 1.00         |                  |          | 1.00 |               |            | 1.00 |                |         |
|                                                                       | poor         | 45       | 2.45         | (1.45 ; 4.12)    | 0.0008   | 5.75 | (2.24-14.8)   | 0.0003     | 4.53 | (2.06 ; 9.98)  | 0.0002  |
| <b>At time of treatment (lymphodepletion and CAR T-cell infusion)</b> |              |          |              |                  |          |      |               |            |      |                |         |
| Status at infusion                                                    | PR/SD PD     | 40<br>76 | 1.00<br>2.72 | -<br>(1.44-5.17) | 0.00215  | 2.85 | (0.99-8.23)   | 0.053      | 3.85 | (1.34-11.07)   | 0.0125  |
| Type of bridging                                                      | low<br>high  | 38<br>78 | 1.00<br>2.22 | (1.19-4.13)      | 0.0117   | 18.5 | (2.4-142.46)  | 0<br>.0051 | 1.28 | (1.25-10.36)   | 0.0174  |
| ECOG PS                                                               | ≥ 2          | 115      | 1.85         | (1.40; 2.45)     | <0.0001  | 2.91 | (1.61; 5.26)  | 0.0004     | 3.46 | (2.36; 5.08)   | <0.0001 |
| Ann Arbor stage                                                       | 0-1-2        | 27       | 1.00         |                  |          | 1.00 |               |            | 1.00 |                |         |
|                                                                       | 3-4          | 89       | 2.89         | (1.31; 6.39)     | 0.009    | 10.7 | (1.38; 83.3)  | 0.042      | 9.43 | (1.28; 69.3)   | 0.028   |
| Nb of ExtraN.sites                                                    |              |          | 1.66         | (1.34; 2.04)     | <0.0001  | 2.54 | (1.60; 4.04)  | <0.0001    | 1.97 | (1.49; 2.61)   | <0.0001 |
| Nb of ExtraN.sites                                                    | <2           | 72       | 1.00         |                  |          |      |               |            | 1.00 |                |         |
|                                                                       | ≥ 2          | 44       | 3.01         | (1.78; 5.09)     | <0.0001  | 7.74 | (2.90; 20.6)  | <0.0001    | 5.72 | (2.53; 12.96)  | <0.0001 |
| LDH D-6, /100                                                         |              | 104      | 1.03         | (1.02; 1.05)     | 0.0002   | 1.05 | (0.99; 1.11)  | 0.11       | 1.05 | (1.03; 1.08)   | <0.0001 |
| LDH D0, /100                                                          |              | 110      | 1.01         | (1.00; 1.01)     | 0.050    | 1.00 | (0.99; 1.02)  | 0.62       | 1.01 | (1.01; 1.02)   | 0.002   |
| IPI                                                                   | High IPI     | 19       | 1.00         |                  |          | 1.00 |               |            | 1.00 |                |         |
|                                                                       | High-int IPI | 34       | 0.4          | (0.21; 0.79)     | 0.008    | 0.30 | (0.09; 0.98)  | 0.046      | 0.35 | (0.15; 0.79)   | 0.012   |
|                                                                       | Low IPI      | 31       | 0.16         | (0.07; 0.36)     | 1,00E-05 | 0.05 | (0.009; 0.27) | 0.0006     | 0.02 | (0; 0.19)      | 0.000   |
|                                                                       | Low-int IPI  | 32       | 0.18         | (0.08; 0.4)      | 2,00E-05 | 0.10 | (0.026; 0.42) | 0.001      | 0.14 | (0.05; 0.4)    | 0.000   |
| Revised.IPI                                                           | other        | 63       | 1.00         |                  |          |      |               |            | 1.00 |                |         |
|                                                                       | poor         | 53       | 3.13         | (1.82; 5.38)     | <0.0001  | 6.23 | (2.28; 17.0)  | 0.0004     | 6.32 | (2.57 ; 15.58) | <0.0001 |

|                           |  |     |      |                 |         |      |                 |        |      |                  |         |
|---------------------------|--|-----|------|-----------------|---------|------|-----------------|--------|------|------------------|---------|
| CRP /10                   |  | 113 | 1.14 | (1.09;<br>1.18) | <0.0001 | 1.21 | (1.08;<br>1.35) | 0.0008 | 1.01 | (1.01 ;<br>1.02) | <0.0001 |
| Ferritin /1000            |  | 115 | 1.05 | (1.01;<br>1.09) | 0.009   | 1.06 | (0.96;<br>1.18) | 0.24   | 1.08 | (1.03;<br>1.14)  | 0.002   |
| Albumin./10               |  | 105 | 0.38 | (0.24;<br>0.58) | <0.0001 | 0.18 | (0.07;<br>0.44) | 0.0002 | 0.85 | (0.8 ;<br>0.9)   | <0.0001 |
| Lymphocyte<br>count /1000 |  | 101 | 0.34 | (0.14;<br>0.83) | 0.018   | 0.30 | (0.06;<br>1.42) | 0.13   | 0.15 | (0.03;<br>0.8)   | 0.027   |
| Bulky > 5.cm              |  | 54  | 2.67 | (1.56;<br>4.56) | 0.0003  | 2.94 | (1.19;<br>7.28) | 0.019  | 3.3  | (1.5;<br>7.26)   | 0.003   |
| Bulky >10cm               |  | 15  | 1.88 | (0.95;<br>3.72) | 0.072   | 2.54 | (0.81;<br>7.94) | 0.11   | 2.51 | (1.02;<br>6.21)  | 0.046   |
| TMTV41% ><br>80.42ml      |  | 50  | 3.48 | (2.02;<br>5.98) | <0.0001 | 7.12 | (2.59;<br>19.6) | 0.0001 | 5.26 | (2.32;<br>11.9)  | <0.0001 |
| TMVTSUV4                  |  | 115 | 1.11 | (1.07;<br>1.16) | <0.0001 | 1.62 | (1.26;<br>2.10) | 0.0002 | 1.12 | (1.07;<br>1.16)  | <0.0001 |
